# Supplementary material for: Engineering Bacillus subtilis for the formation of a durable living biocomposite material
Source: PubMed Central journal article supplement (PMC8654922; doi:10.1038/s41467-021-27467-2), 2021-12-08
Supplement: 41467_2021_27467_MOESM3_ESM.pdf [file 41467_2021_27467_MOESM3_ESM.pdf]

### **Description of Additional Supplementary Files**

File Name: Supplementary Data 1

Description: Plasmids and strains used in this study.

File Name: Supplementary Data 2

Description: Amino acid sequences of proteins and peptides in this study.

File Name: Supplementary Data 3

Description: Nucleotide sequences of proteins and peptides used in this study.

File Name: Supplementary Data 4

Description: List of primers used in this study.
